# Supplementary material
Source: PubMed Central journal article supplement (PMC6650268)
Supplement: NIHMS1514192-supplement-Reporting_Summary.pdf [file NIHMS1514192-supplement-Reporting_Summary.pdf]

## Reporting Summary

Nature Research wishes to improve the reproducibility of the work that we publish. This form provides structure for consistency and transparency in reporting. For further information on Nature Research policies, see [Authors & Referees](#) and the [Editorial Policy Checklist](#).

### Statistical parameters

When statistical analyses are reported, confirm that the following items are present in the relevant location (e.g. figure legend, table legend, main text, or Methods section).

n/a | Confirmed

- The exact sample size ( $n$ ) for each experimental group/condition, given as a discrete number and unit of measurement
- An indication of whether measurements were taken from distinct samples or whether the same sample was measured repeatedly
- The statistical test(s) used AND whether they are one- or two-sided  
*Only common tests should be described solely by name; describe more complex techniques in the Methods section.*
- A description of all covariates tested
- A description of any assumptions or corrections, such as tests of normality and adjustment for multiple comparisons
- A full description of the statistics including central tendency (e.g. means) or other basic estimates (e.g. regression coefficient) AND variation (e.g. standard deviation) or associated estimates of uncertainty (e.g. confidence intervals)
- For null hypothesis testing, the test statistic (e.g.  $F$ ,  $t$ ,  $r$ ) with confidence intervals, effect sizes, degrees of freedom and  $P$  value noted  
*Give  $P$  values as exact values whenever suitable.*
- For Bayesian analysis, information on the choice of priors and Markov chain Monte Carlo settings
- For hierarchical and complex designs, identification of the appropriate level for tests and full reporting of outcomes
- Estimates of effect sizes (e.g. Cohen's  $d$ , Pearson's  $r$ ), indicating how they were calculated
- Clearly defined error bars  
*State explicitly what error bars represent (e.g. SD, SE, CI)*

*Our web collection on [statistics for biologists](#) may be useful.*

### Software and code

Policy information about [availability of computer code](#)

Data collection

LSR II and Fortessa cytometers were used to collect flow cytometry data; 10X Genomics system was used to capture and create libraries for single cell RNA-seq; FACS Aria II sorters were used for all cell sorting

Data analysis

Prism (8), FlowJo (10.5.3); Seurat R Package (version 1.4.0.12)

For manuscripts utilizing custom algorithms or software that are central to the research but not yet described in published literature, software must be made available to editors/reviewers upon request. We strongly encourage code deposition in a community repository (e.g. GitHub). See the Nature Research [guidelines for submitting code & software](#) for further information.

### Data

Policy information about [availability of data](#)

All manuscripts must include a [data availability statement](#). This statement should provide the following information, where applicable:

- Accession codes, unique identifiers, or web links for publicly available datasets
- A list of figures that have associated raw data
- A description of any restrictions on data availability

Single cell RNA-seq data will be deposited in public repositories prior to publication and made available to reviewers/editors upon request

## Field-specific reporting

Please select the best fit for your research. If you are not sure, read the appropriate sections before making your selection.

Life sciences  Behavioural & social sciences  Ecological, evolutionary & environmental sciences

For a reference copy of the document with all sections, see [nature.com/authors/policies/ReportingSummary-flat.pdf](https://www.nature.com/authors/policies/ReportingSummary-flat.pdf)

## Life sciences study design

All studies must disclose on these points even when the disclosure is negative.

|                 |                                                                                                                                                                                                                                                                                                                                                                                                                                                                                                                                                             |
|-----------------|-------------------------------------------------------------------------------------------------------------------------------------------------------------------------------------------------------------------------------------------------------------------------------------------------------------------------------------------------------------------------------------------------------------------------------------------------------------------------------------------------------------------------------------------------------------|
| Sample size     | Sample sizes were not calculated prior to performing experiments but conform to standard practices; Sample sizes were sufficient to detect differences between groups and all comparisons had a minimum of 3 data points                                                                                                                                                                                                                                                                                                                                    |
| Data exclusions | The only data excluded from the manuscript is from cells in single-cell RNA-seq data sets which did not meet pre-established, standard quality thresholds (i.e., cells with fewer than 5 genes per cells)                                                                                                                                                                                                                                                                                                                                                   |
| Replication     | All replicates successfully reproduced similar results                                                                                                                                                                                                                                                                                                                                                                                                                                                                                                      |
| Randomization   | Animals were randomly selected for experiments                                                                                                                                                                                                                                                                                                                                                                                                                                                                                                              |
| Blinding        | Investigators were not blinded to genotypes prior to data collection as non-subjective measures were used to understand the phenotypes observed (i.e. abundance of a population); Bioinformaticists were initially blinded to sample sort origins during single-cell RNA-seq analysis; Investigators were not blinded during colitis experiments as non-subjective measures were used to track disease (weight); A blinded investigator was used for measuring EAE clinical score for 1 experiment and the majority of data points for the other experiment |

## Reporting for specific materials, systems and methods

### Materials & experimental systems

| n/a                                 | Involvement in the study                                        |
|-------------------------------------|-----------------------------------------------------------------|
| <input checked="" type="checkbox"/> | <input type="checkbox"/> Unique biological materials            |
| <input type="checkbox"/>            | <input checked="" type="checkbox"/> Antibodies                  |
| <input checked="" type="checkbox"/> | <input type="checkbox"/> Eukaryotic cell lines                  |
| <input checked="" type="checkbox"/> | <input type="checkbox"/> Palaeontology                          |
| <input type="checkbox"/>            | <input checked="" type="checkbox"/> Animals and other organisms |
| <input checked="" type="checkbox"/> | <input type="checkbox"/> Human research participants            |

### Methods

| n/a                                 | Involvement in the study                           |
|-------------------------------------|----------------------------------------------------|
| <input checked="" type="checkbox"/> | <input type="checkbox"/> ChIP-seq                  |
| <input type="checkbox"/>            | <input checked="" type="checkbox"/> Flow cytometry |
| <input checked="" type="checkbox"/> | <input type="checkbox"/> MRI-based neuroimaging    |

## Antibodies

### Antibodies used

anti-mouse CD4 (GK1.5) BV786, BD Biosciences, 563331, 1:100  
 anti-mouse CD4 (RM4-5) BV510, BD Biosciences, 563106, 1:100  
 anti-mouse CD4 (RM4-5) PE, eBioscience, 12-0042-83, 1:300  
 anti-mouse CD4 (GK1.5) eF450, eBioscience, 48-0041-82, 1:100  
 anti-mouse CD4 (GK1.5) APC, eBioscience, 17-0041-83, 1:300  
 anti-mouse CD4 (RM4-5) FITC, Tonbo Biosciences, 35-0042-U500, 1:100  
 anti-mouse CD4 (GK1.5) PE-Cy7, Biolegend, 100422, 1:300  
 anti-mouse CD4 (RM4-5) BV605, Biolegend, 100548, 1:100  
 anti-mouse CD8a (53-6.7) BV786, BD Biosciences, 563332, 1:100  
 anti-mouse CD8a (53-6.7) APC-eF780, eBioscience, 47-0081-82, 1:100  
 anti-mouse CD8a (53-6.7) Biotin, Tonbo Biosciences, 30-0081-U500, 1:200  
 anti-mouse CD8a (53-6.7) PerCP-Cy5.5, Biolegend, 100734, 1:100  
 anti-mouse CD3 (145-2C11) PE-Cy7, eBioscience, 25-0031-82, 1:100  
 anti-mouse CD25 (PC61.5) PerCP-Cy5.5, Tonbo Biosciences, 65-0251-U100, 1:100  
 anti-mouse CD25 (PC61.5) BV421, Biolegend, 102043, 1:100  
 anti-mouse CD25 (PC61.5) PE-Cy7, eBioscience, 25-0251-82  
 anti-mouse CD25 (PC61.5) APC, eBioscience, 17-0251-82, 1:250 (IHC)  
 anti-mouse FOXP3 (FJK-16s) PE, eBioscience, 12-5773-82, 1:100  
 anti-mouse FOXP3 (FJK-16s) APC, eBioscience, 17-5772-82, 1:100  
 anti-mouse FOXP3 (FJK-16s) FITC, eBioscience, 320112, 1:100  
 anti-mouse FOXP3 (FJK-16s) AF700, eBioscience, 56-5773-82, 1:100 (IHC)

anti-mouse CD45.1 (A20) BV650, BD Biosciences, 563754, 1:200  
 anti-mouse CD45.2 (104) APC, eBioscience, 17-0454-82, 1:200  
 anti-mouse CD90.1 (HIS51) eF450, eBioscience, 57-0900-82, 1:300  
 anti-mouse CD90.2 (53-2.1) APC-eF780, eBioscience, 47-0902-82, 1:300  
 anti-mouse CD73 (eBioTY/11.8) eF450, eBioscience, 48-0731-82, 1:100  
 anti-mouse CD73 (TY/11.8) PE-Cy7, Biolegend 127224, 1:100  
 anti-mouse CD73 (TY/11.8) BV605, Biolegend, 127215, 1:200  
 anti-mouse CD73 (TY/11.8) PE, Biolegend, 127206, 1:100  
 anti-mouse TCRb (H57-597) APC, eBioscience, 17-5961-82, 1:100  
 anti-mouse TCRb (H57-597) APC-eF780, eBioscience, 47-5961-82, 1:200  
 anti-mouse TCRb (H57-597) Pacific Blue, Biolegend, 109226, 1:100  
 anti-mouse TCRb (H57-597) BV421, Biolegend, 109230, 1:1000 (IHC)  
 anti-mouse Ter119 (Ter-119) Biotin, BD Biosciences, 553672, 1:200  
 anti-mouse Ter119 (Ter119) APC-eF780, eBioscience, 47-5921-82, 1:100  
 anti-mouse CD44 (IM7) PE, eBioscience, 12-0411-83, 1:100  
 anti-mouse CD44 (IM7) BV786, BD Biosciences, 563736, 1:100  
 anti-mouse CD45RB (C363.16A), PE, eBioscience, 12-0455-81, 1:100  
 anti-mouse CD11c (N418) APC-eF780, eBioscience, 47-0114-82, 1:100  
 anti-mouse CD11b (M1/70) APC-eF780, eBioscience, 47-0112-82, 1:100  
 anti-mouse NK1.1 (PK136) APC-eF780, eBioscience, 47-5941-82, 1:100  
 anti-mouse F4/80 (BM8) APC-eF780, eBioscience, 47-4801-82, 1:100  
 anti-mouse B220 (RA3-6B22) APC-eF780, eBioscience, 47-0452-82, 1:100  
 anti-mouse Qa2 (69H1-9-9) FITC, eBioscience, 11-5996-82, 1:100  
 anti-mouse HSA (M1/69) PE, eBioscience, 12-0242-83, 1:100  
 anti-mouse CD69 (H1.2F3) PE, BD Biosciences, 553237, 1:100  
 anti-mouse CD69 (H1.2F3) APC, Biolegend, 104514, 1:100  
 anti-mouse RORYT (Q31-378) PE-CF594, BD Biosciences, 562684, 1:500 (IHC)  
 anti-mouse MHC-1 H2Kb (AF6-88.5.5.3), eBioscience, 17-5958-82, 1:100  
 anti-cleaved caspase 3 Asp175 (D3E9) Alexa 647, Cell Signaling Technology, 96025, 1:50  
 anti-cleaved caspase 3 Asp175 (D3E9) PE, Cell Signaling Technology, 127685, 1:50  
 anti-GFP FITC, Rockland, 600-402-215, 1:400

Multiple lots of antibodies were used which did not affect results or reproducibility.

#### Validation

Validation data for all antibodies are available on the manufacturers website

## Animals and other organisms

Policy information about [studies involving animals](#); [ARRIVE guidelines](#) recommended for reporting animal research

#### Laboratory animals

Mice were housed in specific pathogen-free facilities at the University of Minnesota, Cornell University, Salk Institute or University of California San Francisco, and experiments were in accordance with protocols approved by the Institutional Animal Care and Use Committee. The one exception are mice with a normalized microbial experience which were housed in the University of Minnesota's mouse vivarium. Pet store mice were purchased from various pet stores in the greater Minneapolis-St. Paul metropolitan area. Information about the age of the pet store mice was not available from the vendor. Co-housing of SPF mice with sex-matched pet store partner was performed as described (Beura, et al., 2016) within the University of Minnesota BSL-3 facility. Conversion efficiency was confirmed by assessing the conversion of naïve CD8+T cells into CD8+memory T cells; effective conversion correlated with ~30-60%CD8+CD44hiT cells. All relevant ethical guidelines have been followed. Foxp3-GFPmice (006772), Foxp3-RFPmice (008374) were from the Jackson Laboratory. CD45.1+(B6.SJL) mice were from the US National Cancer Institute. Nur77-GFPBAC reporter mice, Rag2-GFP reporter mice, Cns3-/- and Foxp3-GFPKIN, CD28-/-, Nfkb1-/-, Itk-/-, Itk-/-x Il4Ra-/-, Adap-/-, Il2ra EDEL (and littermate NOD controls), Itgal-/-, Rag2-/-, Cd1d-/- and Tcliβ x TCRα+/- have been described previously (Boursalian et al., 2004; Fontenot et al., 2005; Hsieh et al., 2004; Huang et al., 2014a; Liao and Littman, 1995; Moran et al., 2011; Peterson et al., 2001; Sha et al., 1995; Shahinian et al., 1993; Shinkai et al., 1992; Simeonov et al., 2017; Sonoda et al., 1999; Zheng et al., 2010). Age of mice was generally between six to eight weeks but the range over experiments was four to sixteen weeks old. Mice were randomly selected for experiments, in age-matched cohorts. EAE experiments were performed with female donors and recipients however other experiments used male or female mice. The investigators were not 'blinded' to genotype during data acquisition.

#### Wild animals

Pet store mice were purchased from various pet stores in the greater Minneapolis-St. Paul metropolitan area. Information about the age of the pet store mice was not available from the vendor. Co-housing of SPF mice with sex-matched pet store partner was performed as described (Beura et al., 2016) within the University of Minnesota BSL-3 facility.

#### Field-collected samples

No field-collected samples were used in this study

## Flow Cytometry

### Plots

Confirm that:

- The axis labels state the marker and fluorochrome used (e.g. CD4-FITC).
- The axis scales are clearly visible. Include numbers along axes only for bottom left plot of group (a 'group' is an analysis of identical markers).
- All plots are contour plots with outliers or pseudocolor plots.
- A numerical value for number of cells or percentage (with statistics) is provided.

### Methodology

Sample preparation

Sample preparation is described in detail within the methods section.

Instrument

LSR II, Fortessa, and Aria II

Software

FlowJo (10.5.3)

Cell population abundance

Representative post-sort data is presented in figure 1

Gating strategy

Gating strategy is presented in figures 1 and 8 for thymic TRP/Treg and tetramer staining respectively. Briefly, lymphocytes were identified by SSC-A vs FSC-A then singlets by SSC-A by SSC-W; CD4 single positive cells were identified as CD8- CD4+, either bulk CD4 single positive or CD73- CD4 single positive cells were analyzed for CD25+FOXP3-, CD25-FOXP3lo or CD25+FOXP3+ cells.

- Tick this box to confirm that a figure exemplifying the gating strategy is provided in the Supplementary Information.
