# Supplementary material
Source: PubMed Central journal article supplement (PMC6650268)
Supplement: NIHMS1514192-supplement-Supplementary_Table_and_Note.pdf [file NIHMS1514192-supplement-Supplementary_Table_and_Note.pdf]

|                                                            | Ratio of Morisita-Horn indices for all TCRs | Ratio of Morisita-Horn indices for T <sub>reg</sub> restricted TCRs | p-value |
|------------------------------------------------------------|---------------------------------------------|---------------------------------------------------------------------|---------|
| CD25 <sup>+</sup> T <sub>reg</sub> P to T <sub>reg</sub>   | 0.31±0.29                                   | 0.44±0.37                                                           | p>0.2   |
| Foxp3 <sup>lo</sup> T <sub>reg</sub> P to T <sub>reg</sub> | 0.35±0.35                                   | 0.41±0.36                                                           | p>0.2   |

**Supplementary Table 1.** Shown are the ratios of the Morisita –Horn indices for CD25<sup>+</sup> T<sub>reg</sub>P cells to mature T<sub>reg</sub> cells and Foxp3<sup>lo</sup> T<sub>reg</sub>P to mature T<sub>reg</sub> cells when analysis is based on all sequenced TCR sequences or when restricting analysis to only TCRs that were found in mature CD25<sup>+</sup>Foxp3<sup>+</sup> Treg cells. p-values calculated using two-sided t-test.

| REAGENT or RESOURCE                   | SOURCE            | Catalog number |
|---------------------------------------|-------------------|----------------|
| Antibodies                            |                   |                |
| anti-mouse CD4 (GK1.5)- BV786         | BD Biosciences    | 563331         |
| anti-mouse CD4 (RM4-5)- BV510         | BD Biosciences    | 563106         |
| anti-mouse CD4 (RM4-5)- PE            | eBioscience       | 12-0042-83     |
| anti-mouse CD4 (GK1.5)- eF450         | eBioscience       | 48-0041-82     |
| anti-mouse CD4 (GK1.5)- APC           | eBioscience       | 17-0041-83     |
| Anti-mouse CD4 (RM4-5)- FITC          | Tonbo Biosciences | 35-0042-U500   |
| Anti-mouse CD4 (GK1.5)- PE-Cy7        | Biolegend         | 100422         |
| Anti-mouse CD4 (RM4-5)- BV605         | Biolegend         | 100548         |
| Anti-mouse CD8 (53-6.7)- BV786        | BD Biosciences    | 563332         |
| Anti-mouse CD8 (53-6.7)- APC-eF780    | eBioscience       | 47-0081-82     |
| Anti-mouse CD8 (53-6.7)- Biotin       | Tonbo Biosciences | 30-0081-U500   |
| Anti-mouse CD8 (53-6.7)- PerCP-Cy5.5  | Biolegend         | 100734         |
| Anti-mouse CD3 (145-2C11)- PE-Cy7     | eBioscience       | 25-0031-82     |
| Anti-mouse CD25 (PC61.5)- PerCP-Cy5.5 | Tonbo Biosciences | 65-0251-U100   |
| Anti-mouse CD25 (PC61.5)- BV421       | Biolegend         | 102043         |
| Anti-mouse CD25 (PC61.5)- PE-Cy7      | eBioscience       | 25-0251-82     |
| Anti-mouse CD25 (PC61.5)- APC         | eBioscience       | 17-0251-82     |
| Anti-mouse FOXP3 (FJK-16s)- PE        | eBioscience       | 12-5773-82     |
| Anti-mouse FOXP3 (FJK-16s)- APC       | eBioscience       | 17-5773-82     |
| Anti-mouse FOXP3 (FJK-16s)- FITC      | Biolegend         | 320112         |
| Anti-mouse FOXP3 (FJK-16s)- AF700     | eBioscience       | 56-5773-82     |
| Anti-mouse CD45.1 (A20)- BV650        | BD Biosciences    | 563754         |
| Anti-mouse CD45.2 (104)- APC          | eBioscience       | 17-0454-82     |
| Anti-mouse CD90.1 (HIS51)- eF450      | eBioscience       | 57-0900-82     |
| Anti-mouse CD90.2 (53-2.1)- APC-eF780 | eBioscience       | 47-0902-82     |
| Anti-mouse CD73 (eBioTY/11.8)- eF450  | eBioscience       | 48-0731-82     |
| Anti-mouse CD73 (TY/11.8)- PE-Cy7     | Biolegend         | 127224         |

|                                                 |                           |             |
|-------------------------------------------------|---------------------------|-------------|
| Anti-mouse CD73 (TY/11.8)- BV605                | Biolegend                 | 127215      |
| Anti-mouse CD73 (TY/11.8)- PE                   | Biolegend                 | 127206      |
| Anti-mouse TCRbeta (H57-597)- APC               | eBioscience               | 17-5961-83  |
| Anti-mouse TCRbeta (H57-597)- APC-eF780         | eBioscience               | 47-5961-82  |
| Anti-mouse TCRbeta (H57-597)- Pacific Blue      | Biolegend                 | 109226      |
| Anti-mouse TCRbeta (H57-597)- BV421             | Biolegend                 | 109230      |
| Anti-mouse Ter-119 (Ter-119)- Biotin            | BD Biosciences            | 553672      |
| Anti-mouse Ter-119 (Ter119)- APC-eF780          | eBioscience               | 47-5921-82  |
| Anti-mouse CD44 (IM7)- PE                       | eBioscience               | 12-0441-83  |
| Anti-mouse CD44 (IM7)- BV786                    | BD Biosciences            | 563736      |
| Anti-mouse CD45RB (C363.16A)- PE                | eBioscience               | 12-0455-81  |
| Anti-mouse CD11c (N418)- APC-eF780              | eBioscience               | 47-0114-82  |
| Anti-mouse CD11b (M1/70)- APC-eF780             | eBioscience               | 47-0112-82  |
| Anti-mouse NK1.1 (PK136)- APC-eF780             | eBioscience               | 47-5941-82  |
| Anti-mouse F4/80 (BM8)- APC-eF780               | eBioscience               | 47-4801-82  |
| Anti-mouse B220 (RA3-6B22)- APC-eF780           | eBioscience               | 47-0452-82  |
| Anti-cleaved-caspase 3 Asp175 (D3E9)- Alexa 647 | Cell Signaling Technology | 9602S       |
| Anti-cleaved-caspase 3 Asp175 (D3E9)- PE        | Cell Signaling Technology | 12768S      |
| Anti-GFP-FITC                                   | Rockland                  | 600-402-215 |
| Anti-mouse Qa2 (69H1-9-9)- FITC                 | eBioscience               | 11-5996-82  |
| Anti-mouse HSA (M1/69)- PE                      | eBioscience               | 12-0242-83  |
| Anti-mouse CD69 (H1.2F3)- PE                    | BD Biosciences            | 553237      |
| Anti-mouse CD69 (H1.2F3)- APC                   | Biolegend                 | 104514      |
| Anti-mouse ROR $\gamma$ T (Q31-378)- PE-CF594   | BD Biosciences            | 562684      |
| Anti-mouse MHC-I H2Kb (AF6-88.5.5.3)- APC       | eBioscience               | 17-5958-82  |
| Chemicals, Peptides, and Recombinant Proteins   |                           |             |
| Human recombinant IL2                           | R&D Systems               | 202-IL      |
| Mouse recombinant IL4                           | Tonbo Biosciences         | 21-8041     |

|                                                      |                              |            |
|------------------------------------------------------|------------------------------|------------|
| Annexin V- APC                                       | BD Biosciences               | 550475     |
| Dasatinib                                            | Axon Medchem                 | BMS-354825 |
| MOG <sub>35-55</sub> Peptide (MEVGWYRSPFSRVVHLYRNGK) | GenScript                    | RP10245    |
| Complete Freund's Adjuvant                           | Sigma Life Science           | F5881      |
| M. Tuberculosis Des. H37 RA                          | Difco Laboratories           | 231141     |
| Pertussis Toxin #180                                 | List Biological Laboratories | #180       |
| Streptavidin APC-eF780                               | eBioscience                  | 47-4317-82 |
| Live/Dead Fixable Viability Dye eF780                | eBioscience                  | 65-0865-14 |
| Live/Dead Fixable Blue Dead Cell Stain               | ThermoFisher                 | L-23105    |
| Critical Commercial Assays                           |                              |            |
| Transcription Factor Staining Kit                    | eBioscience                  | 00-5523-00 |
| RNeasy Kit                                           | Qiagen                       | 74004      |
| Annexin V Staining Buffer                            | eBioscience                  | 00-0055-43 |
|                                                      |                              |            |
